# Supplementary material for: The first study about the relationship between the extractability of thiacalix[4]arene derivatives and the position of the coordination binding sites
Source: Royal Society of Chemistry journal article supplement (doi:10.1039/c4ob02393e), 2015-01-01
Supplement: c4ob02393e1.pdf [file c4ob02393e1.pdf]

## SUPPORTING INFORMATION

Manuscript title: **The first study about the relationship between the extractability of thiacalix[4]arene derivatives and the position of the coordination binding sites†**

Author(s): Jiang-Lin Zhao,<sup>a</sup> Hirotsugu Tomiyasu,<sup>a</sup> Xin-Long Ni,<sup>b</sup> Xi Zeng,<sup>b</sup> Mark R. J. Elsegood,<sup>c</sup> Carl Redshaw<sup>d</sup> Shofiur Rahman,<sup>e</sup> Paris E. Georghiou<sup>e</sup> and Takehiko Yamato<sup>\*a</sup>

<sup>a</sup> Department of Applied Chemistry, Faculty of Science and Engineering, Saga University, Honjo-machi 1, Saga 840-8502 Japan, E-mail: yamatot@cc.saga-u.ac.jp.

<sup>b</sup> Department Key Laboratory of Macrocyclic and Supramolecular Chemistry of Guizhou Province, Guizhou University, Guiyang, Guizhou, 550025, China.

<sup>c</sup> Chemistry Department, Loughborough University, Loughborough, LE11 3TU, UK.

<sup>d</sup> Department of Chemistry, The University of Hull, Cottingham Road, Hull, Yorkshire, HU6 7RX, UK.

<sup>e</sup> Department of Chemistry, Memorial University of Newfoundland, St. John's, Newfoundland and Labrador, Canada A1B3X7.

### Table of Contents

| Description                                                                                           | Page Number |
|-------------------------------------------------------------------------------------------------------|-------------|
| Figure S1-S2. <sup>1</sup> H NMR & <sup>13</sup> C NMR spectrum of compound <b>3</b>                  | 2           |
| Figure S3-S4. IR & Mass spectrum of compound <b>3</b>                                                 | 3           |
| Figure S5-S6. <sup>1</sup> H NMR & <sup>13</sup> C NMR spectrum of compound <b>2</b>                  | 4           |
| Figure S7-S8. IR spectrum of compound <b>2</b> and <sup>1</sup> H NMR spectrum of compound <b>4</b>   | 5           |
| Figure S9-S10. <sup>13</sup> C NMR spectrum of compound <b>4</b> and IR spectrum of compound <b>4</b> | 6           |
| Figure S11. Mass spectrum of compound <b>4</b>                                                        | 7           |
| Figure S12. Job's plot for complexation of <b>2</b> , <b>3</b> and <b>4</b> with Ag <sup>+</sup> ion  | 8           |
| Figure S13-14. Association constant for complexation of <b>2</b> with Ag <sup>+</sup> ion             | 9           |
| Figure S15-16. Association constant for complexation of <b>3</b> with Ag <sup>+</sup> ion             | 10          |
| Figure S17-18. Association constant for complexation of <b>4</b> with Ag <sup>+</sup> ion             | 11          |
| General Description for Computational Study                                                           | 12          |
| Figure S19-20. Geometry Optimized Structures of <b>2</b> and <b>2</b> ⊃Ag <sup>+</sup> Complex        | 13          |
| Figure S21-22. Geometry Optimized Structures of <b>3</b> and <b>3</b> ⊃Ag <sup>+</sup> Complex        | 14          |
| Figure S23-24. Geometry Optimized Structures of <b>4</b> and <b>4</b> ⊃Ag <sup>+</sup> Complex        | 15          |
| Table S1. The Calculated Distance for Selected Parameters of <b>2-4</b> with Ag <sup>+</sup>          | 16          |
| Table S2. DFT Calculated binding energies                                                             | 17          |

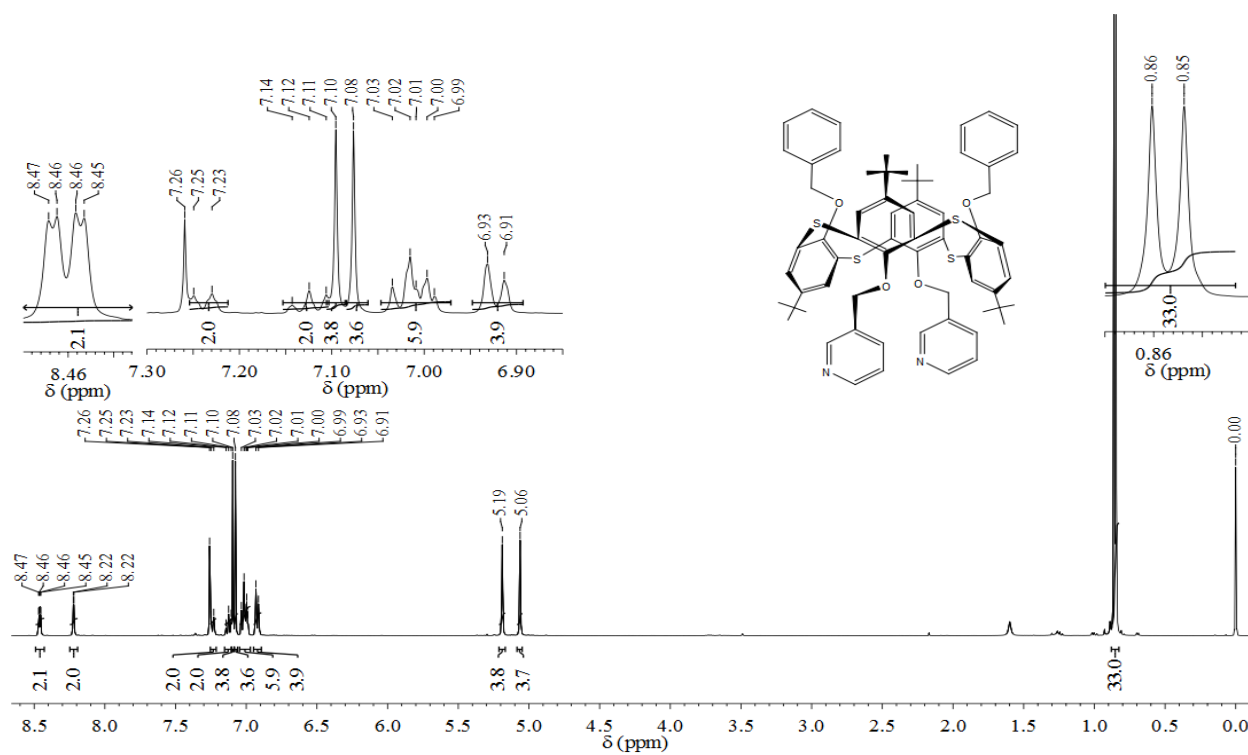

**Figure S1.**  $^1\text{H}$ -NMR spectrum of compound **3** (400 MHz,  $\text{CDCl}_3$ , 293 K).

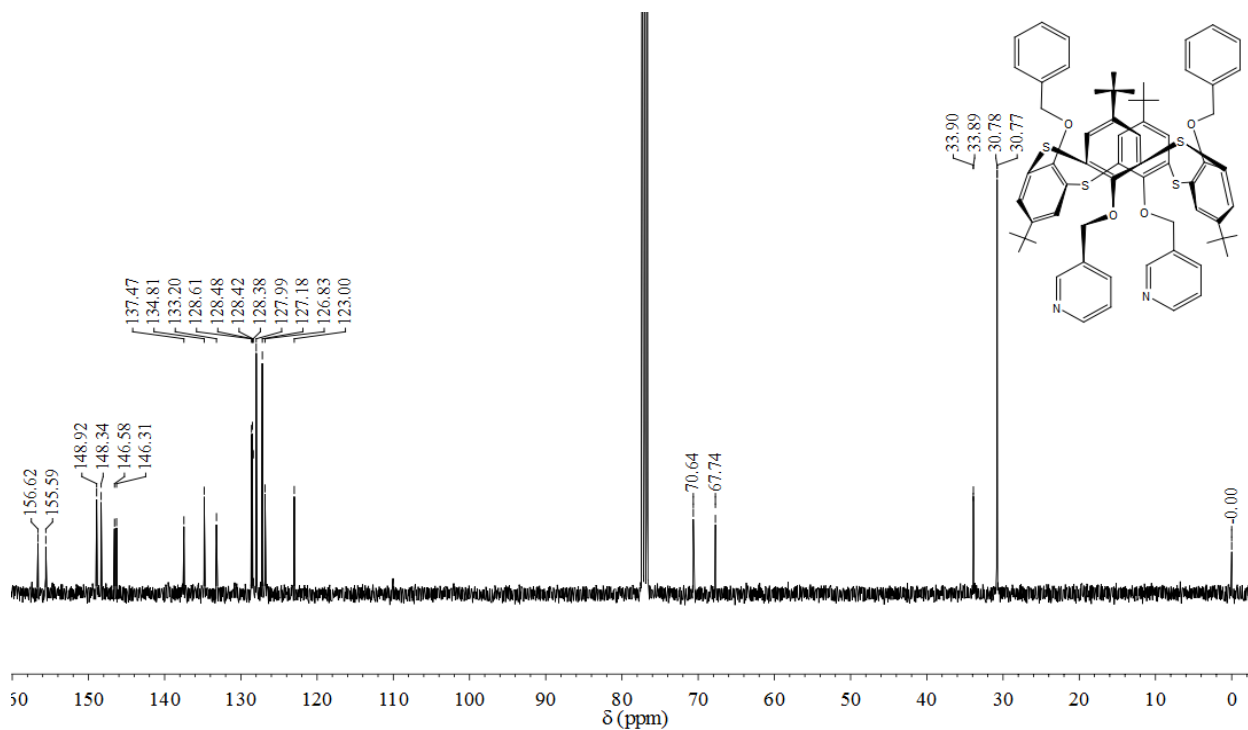

**Figure S2.**  $^{13}\text{C}$ -NMR spectrum of compound **3** (100 MHz,  $\text{CDCl}_3$ , 293 K).

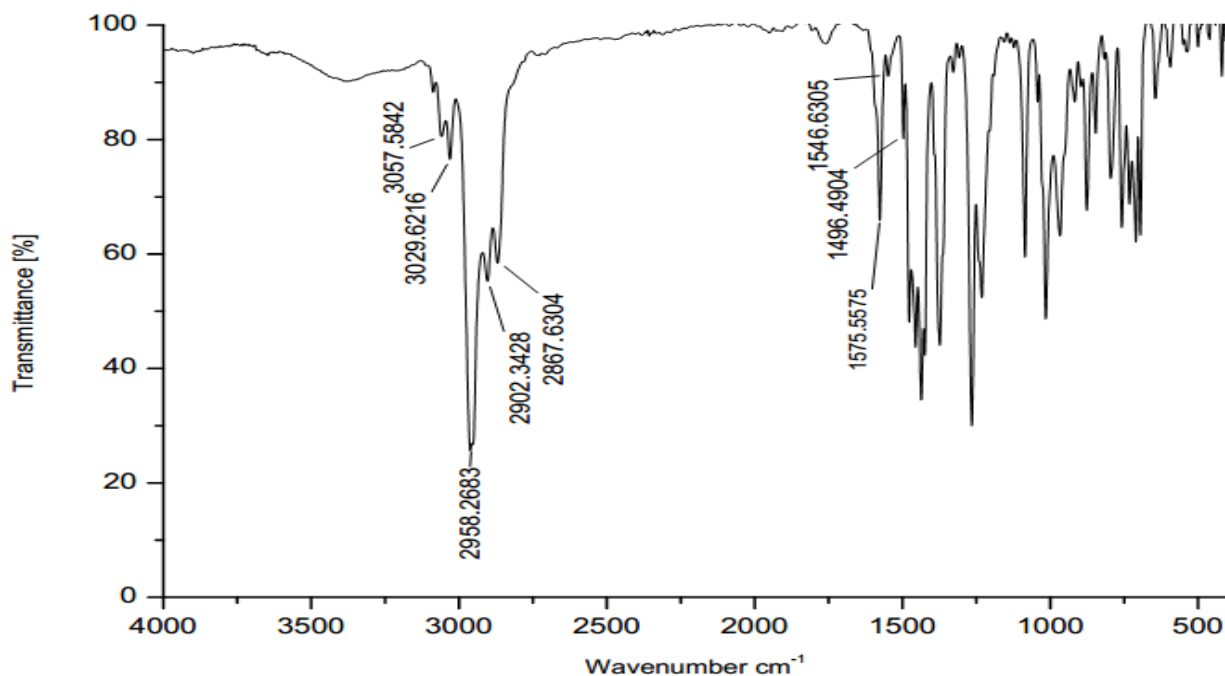

Figure S3. IR spectrum of compound 3.

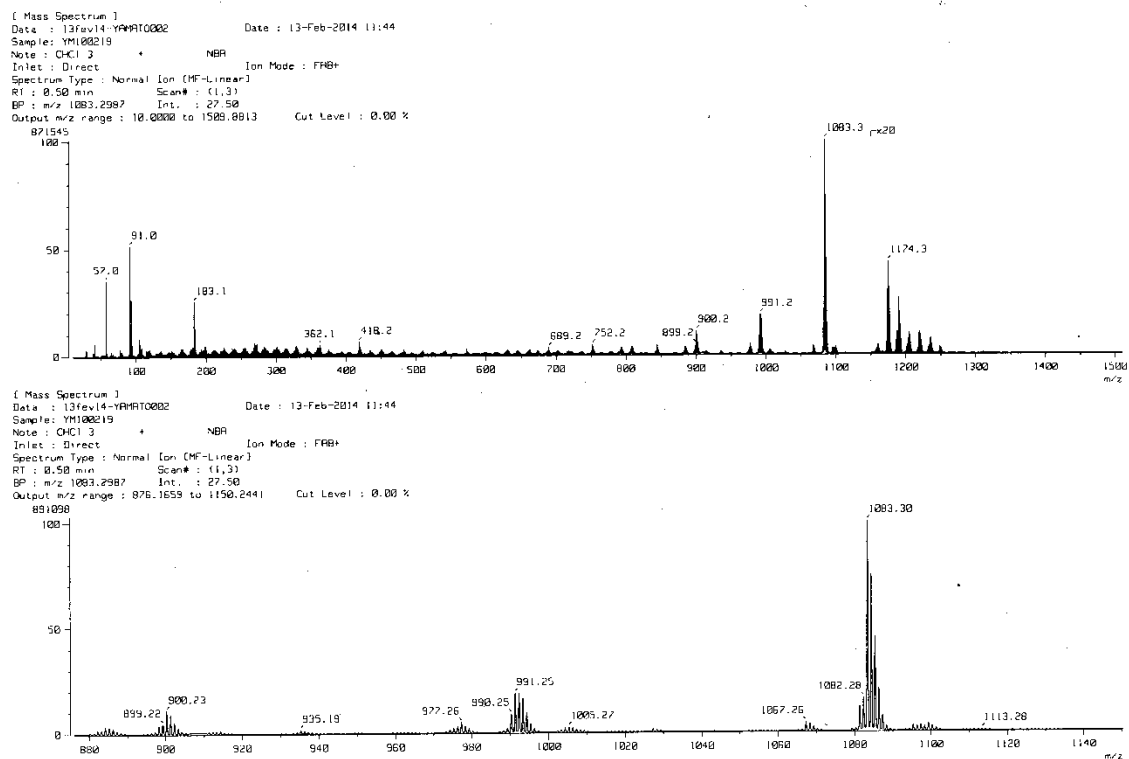

Figure S4. Mass spectrum of compound 3.

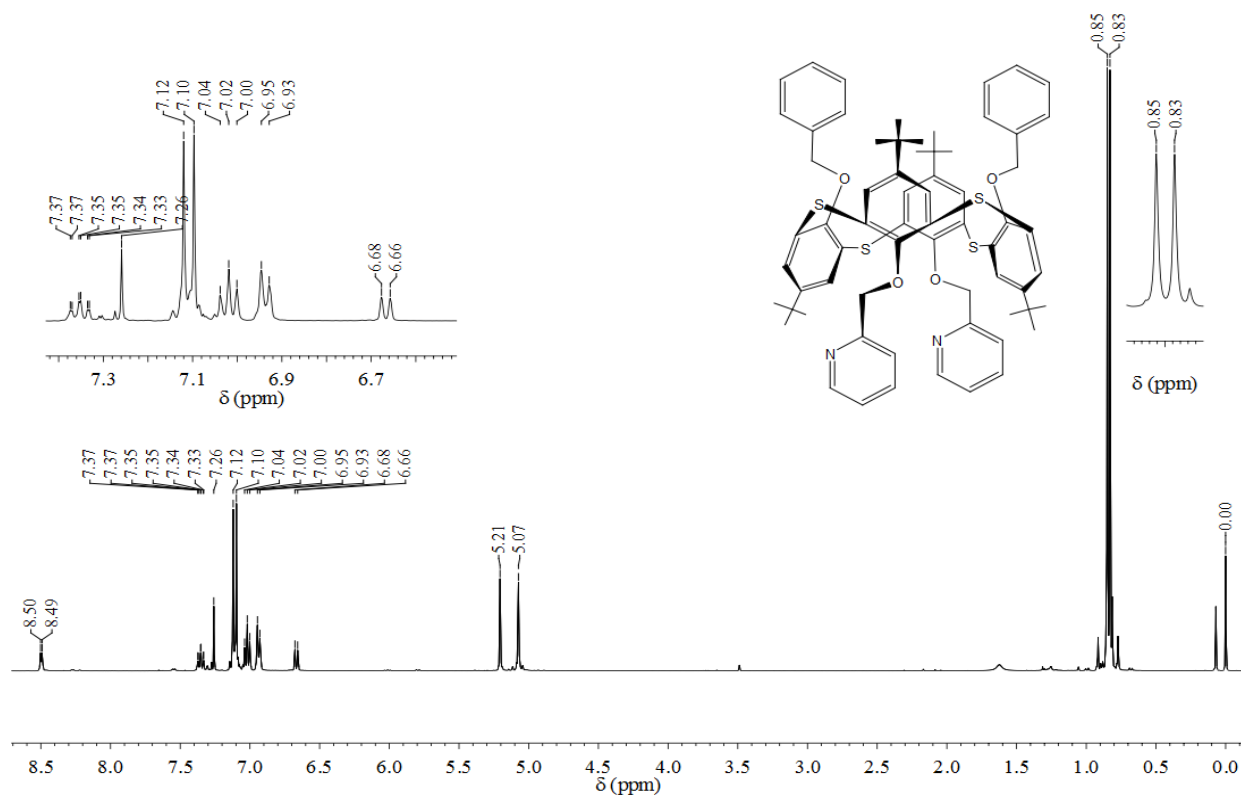

Figure S5.  $^1\text{H-NMR}$  spectrum of compound **2** (400 MHz,  $\text{CDCl}_3$ , 293 K).

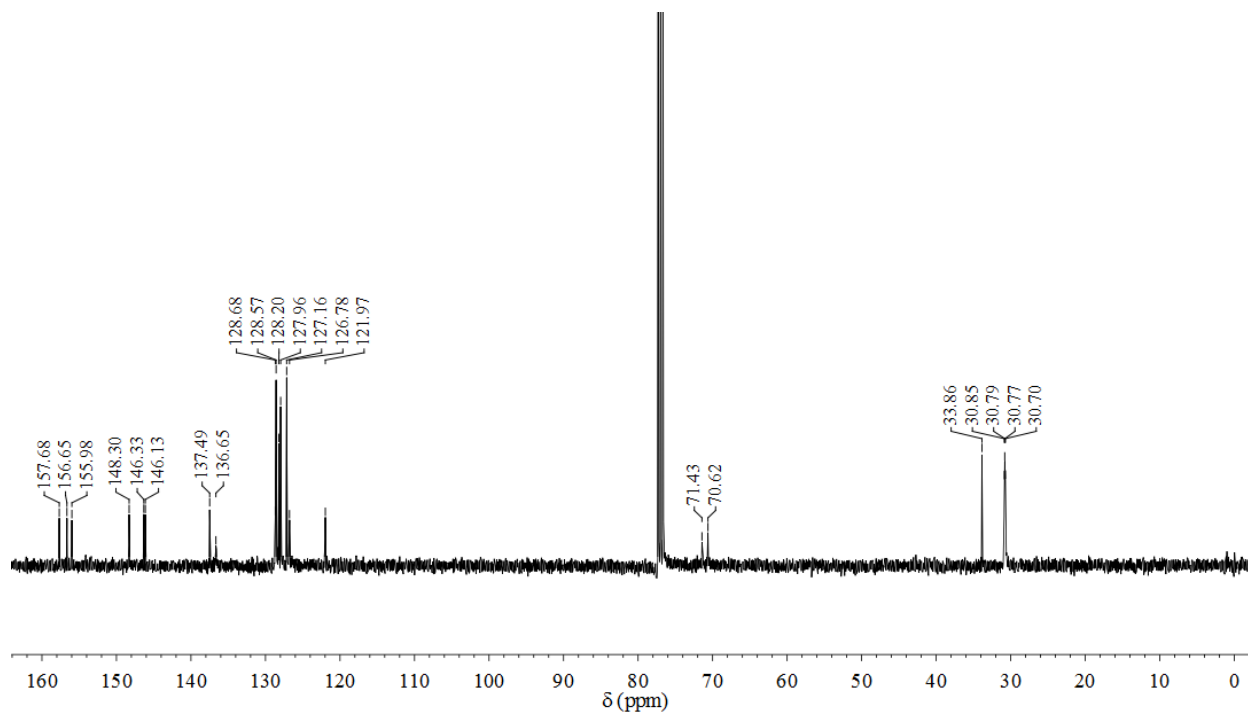

Figure S6.  $^{13}\text{C-NMR}$  spectrum of compound **2** (100 MHz,  $\text{CDCl}_3$ , 293 K).

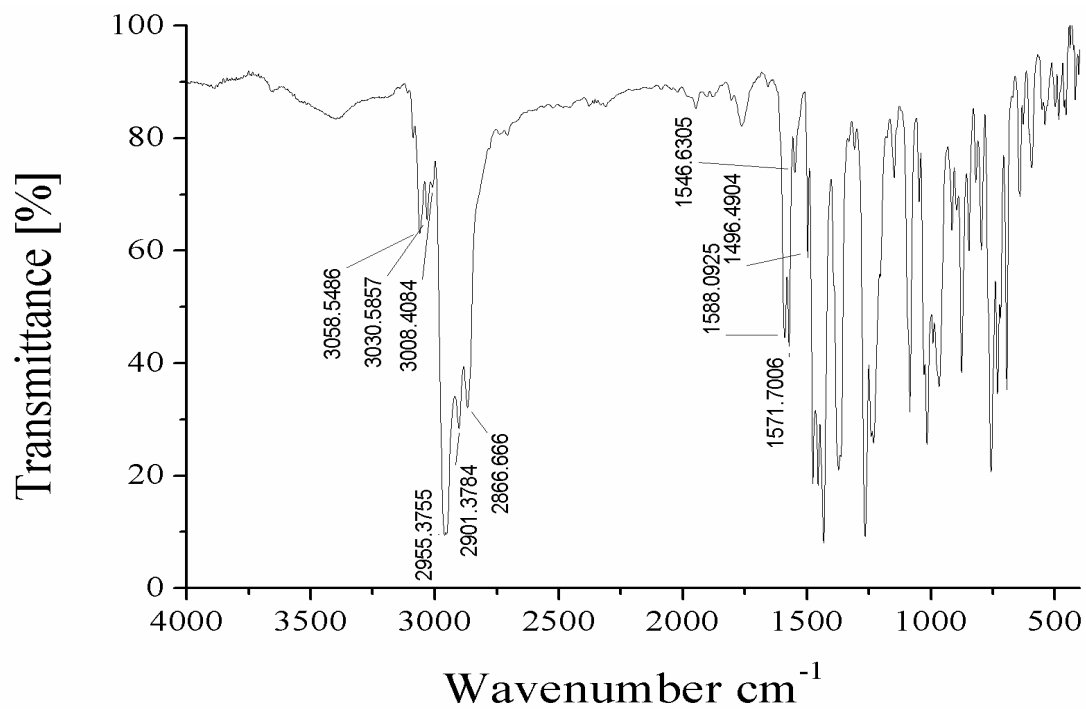

Figure S7. IR spectrum of compound 2.

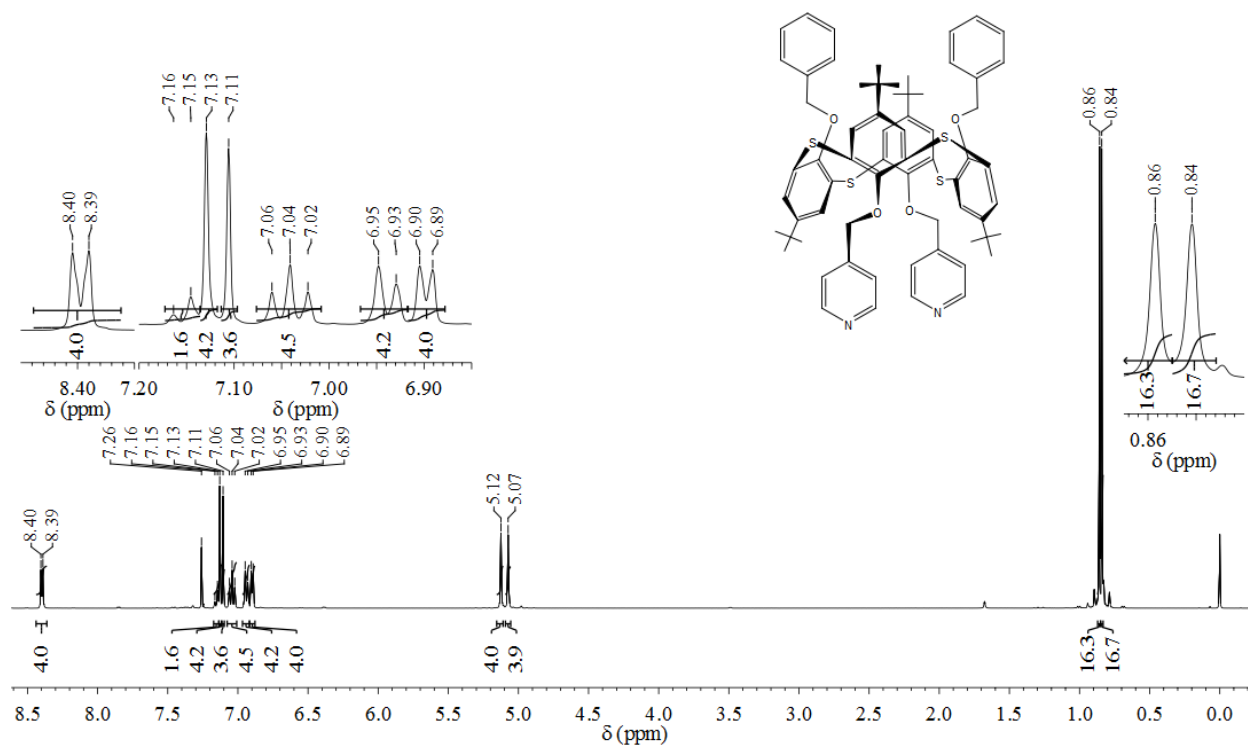

Figure S8.  $^1\text{H-NMR}$  spectrum of compound 4 (400 MHz,  $\text{CDCl}_3$ , 293 K).

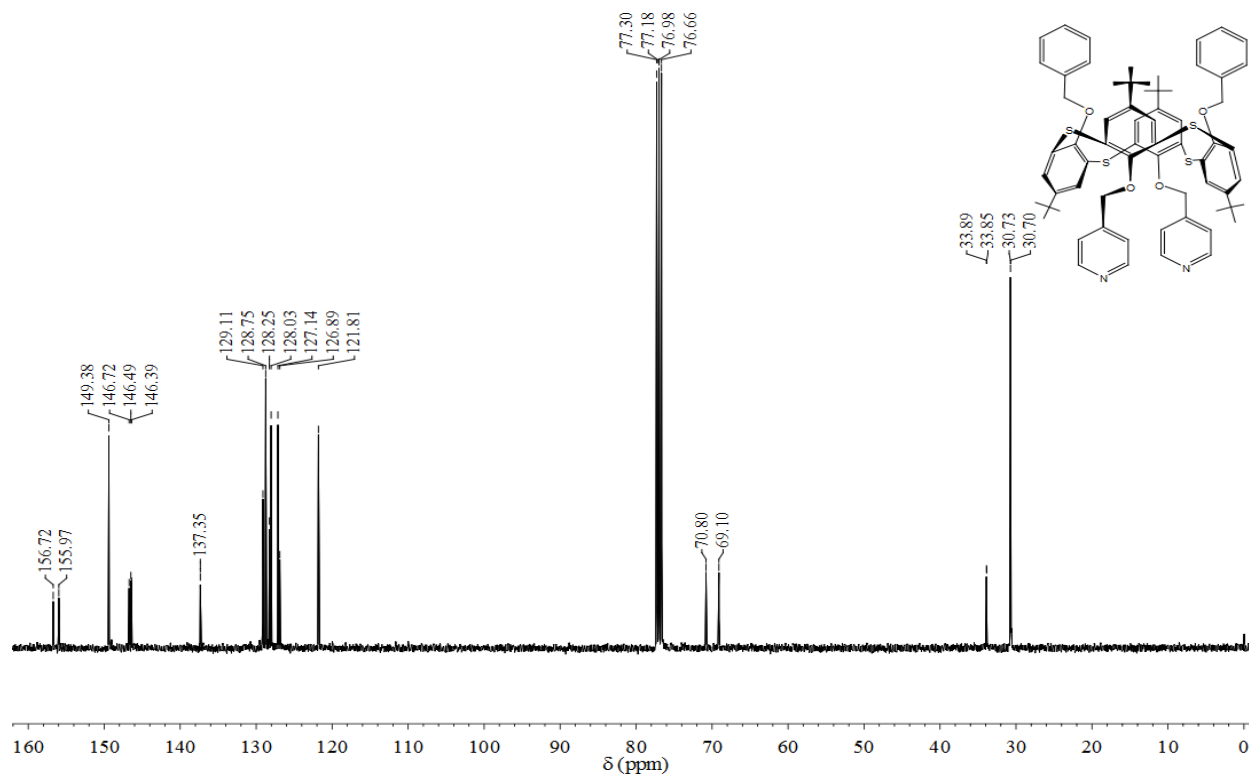

Figure S9.  $^{13}\text{C}$ -NMR spectrum of compound 4 (100 MHz,  $\text{CDCl}_3$ , 293 K).

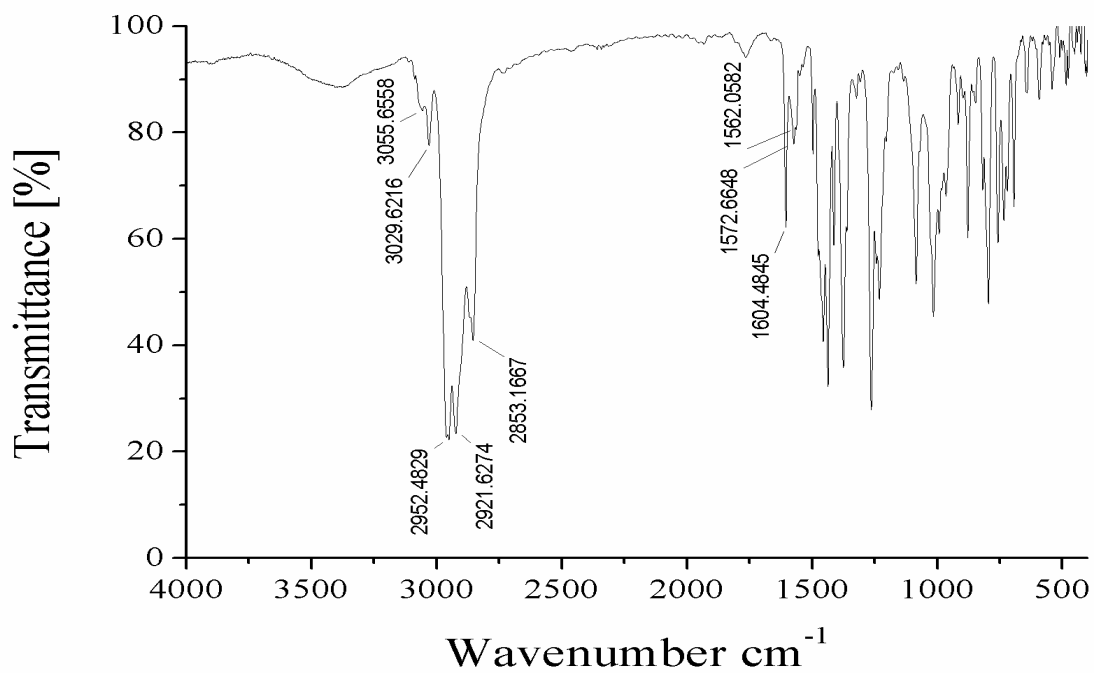

Figure S10. IR spectrum of compound 4.

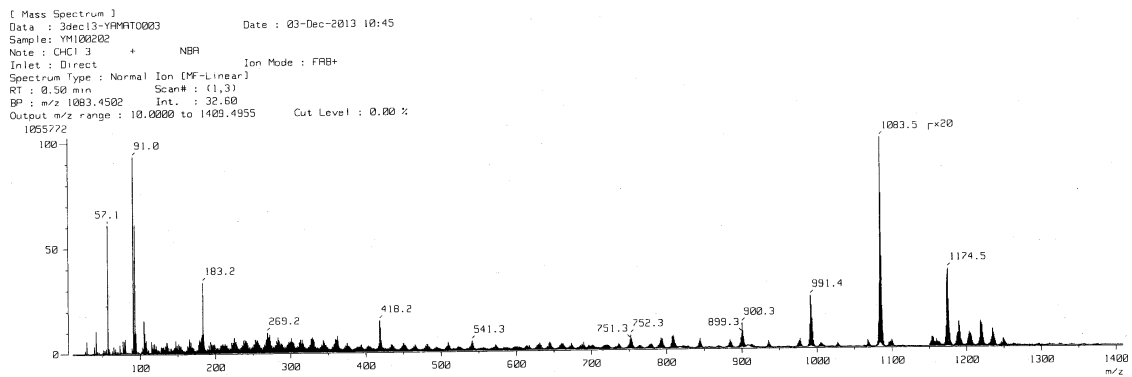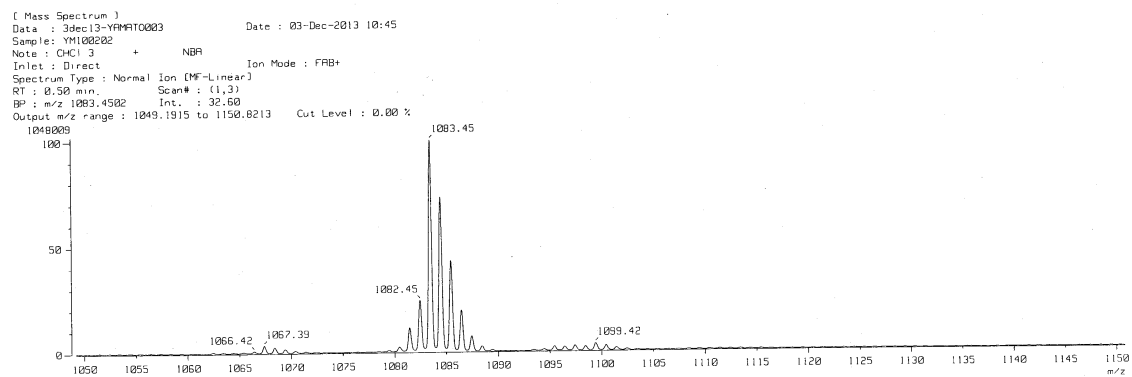

Figure S11. Mass spectrum of compound 4.

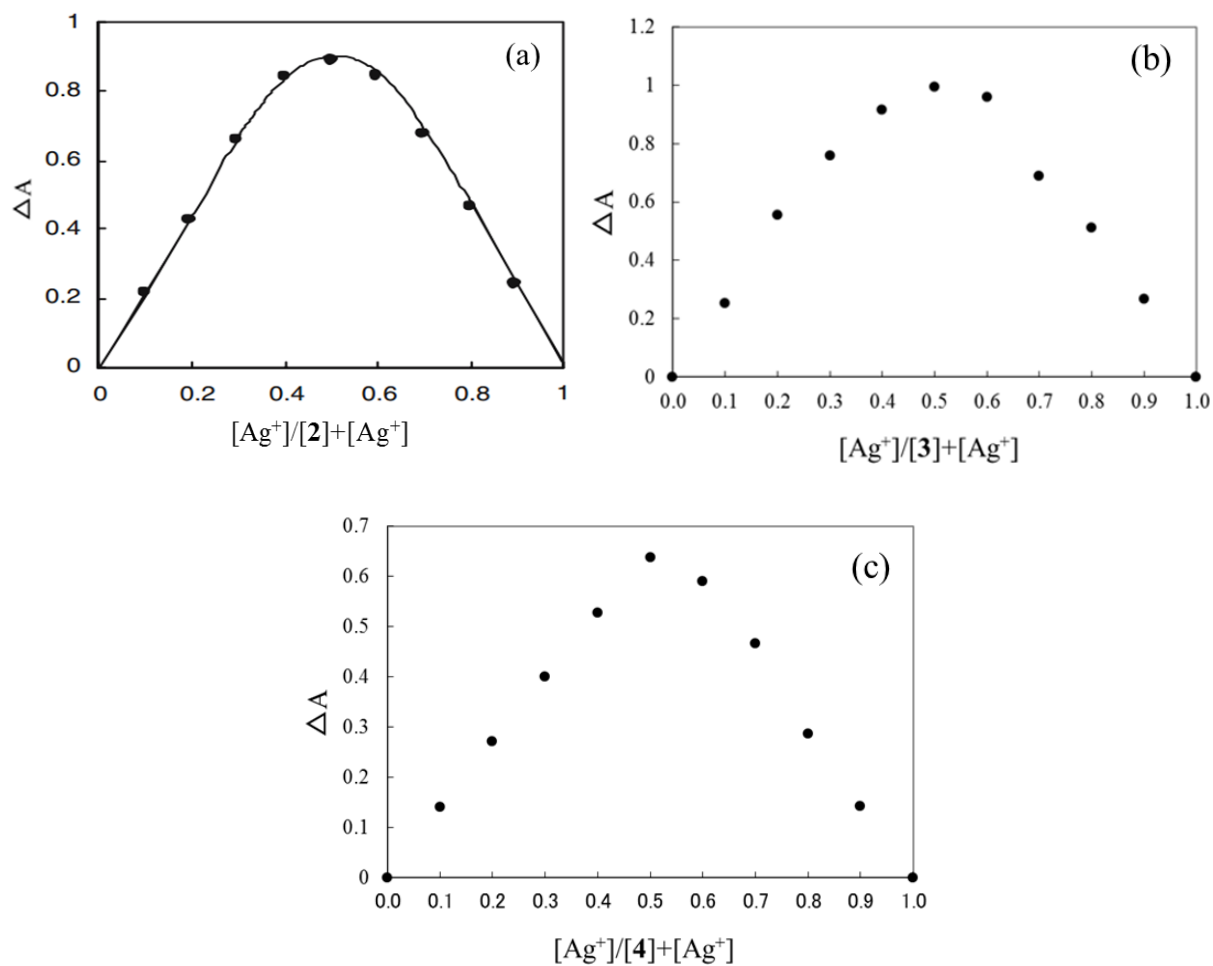

**Figure S12** Job's plot for complexation of (a) **2** with  $\text{Ag}^+$ , (b) **3** with  $\text{Ag}^+$  ion and (c) **4** with  $\text{Ag}^+$  ion.

## Reference

1. T. Yamato, C. P. Casas, H. Yamamoto, M. R. J. Elsegood, S. H. Dale and C. Redshaw, *J. Incl. Phenom. Macrocycl. Chem.*, 2005, **54**, 261–269.



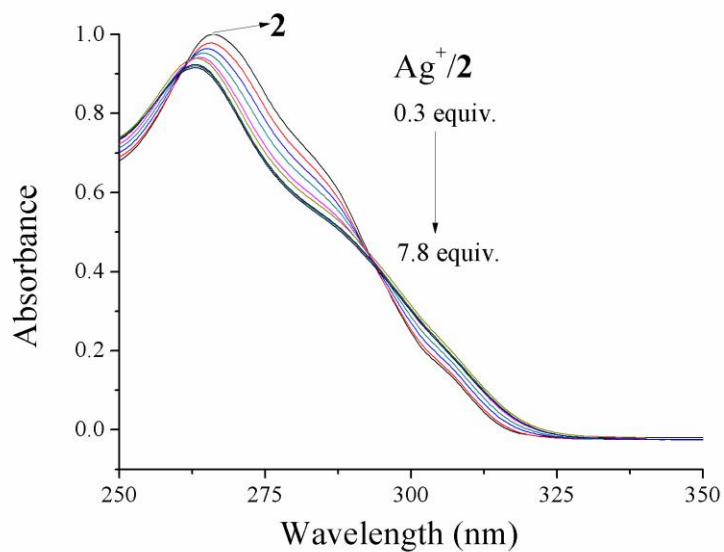

**Figure S13** UV titration studies of **2** ( $1.5 \times 10^5$  M/L) upon addition of AgClO<sub>4</sub> in CHCl<sub>3</sub>.

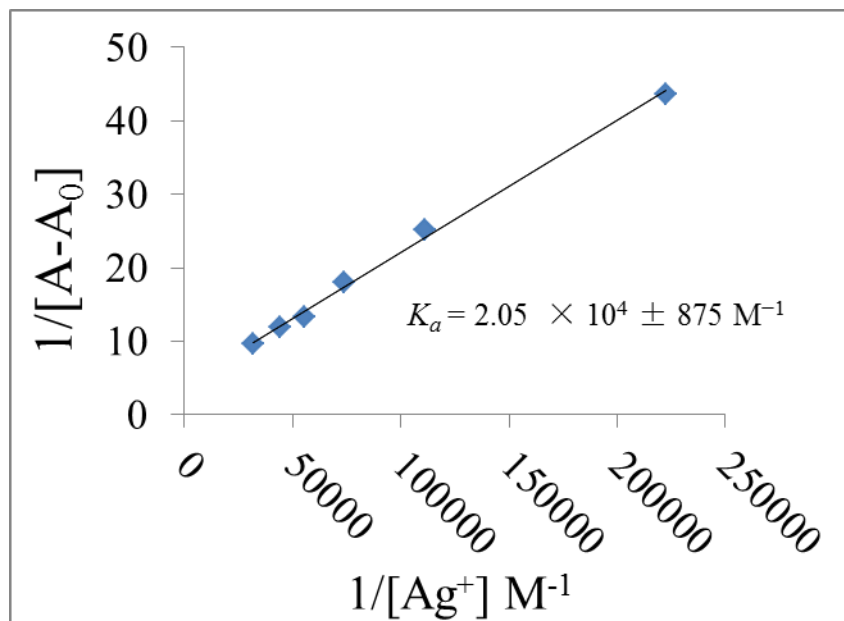

**Figure S14** Benesi-Hildebrand plot of **2** for various concentrations of Ag<sup>+</sup> ion at 298 K. The associate constant ( $K_a$ ) was calculated to be  $2.05 \times 10^4 \pm 875$  M<sup>-1</sup>.

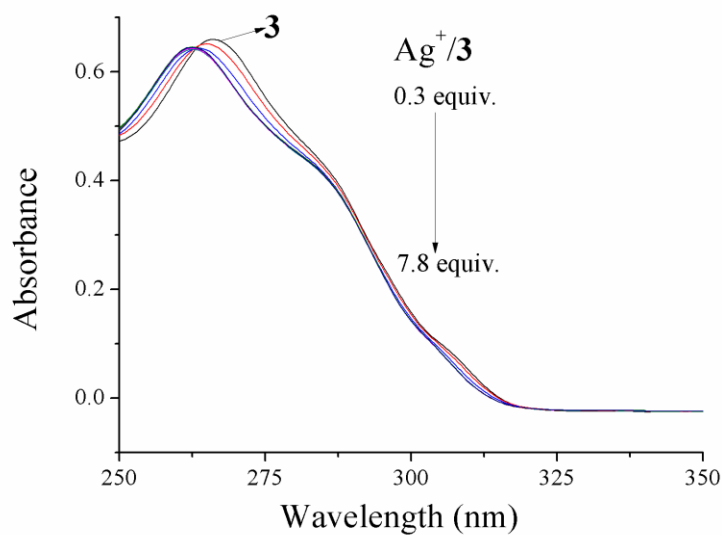

**Figure S15** UV titration studies of **3** ( $1.5 \times 10^5$  M/L) upon addition of  $\text{AgClO}_4$  in  $\text{CHCl}_3$ .

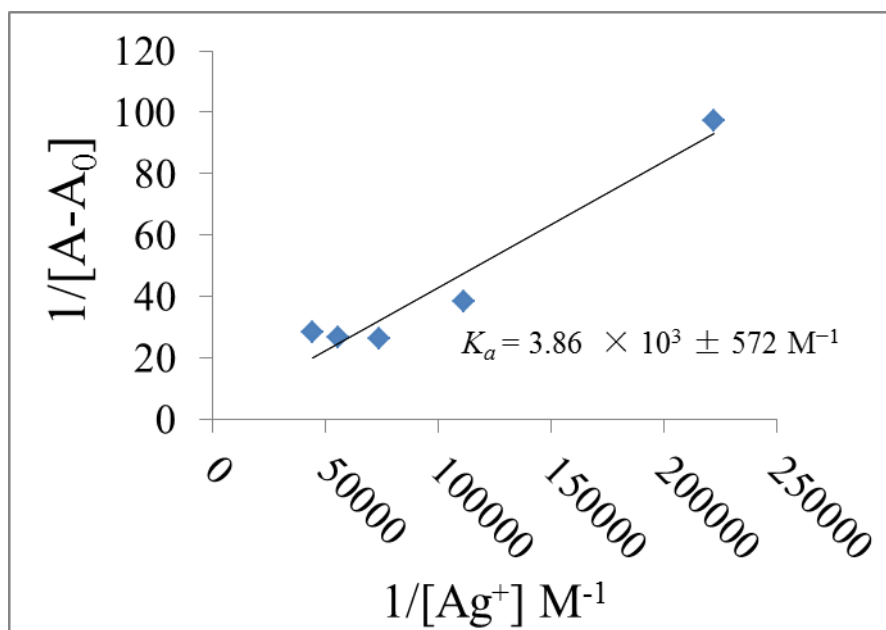

**Figure S16** Benesi-Hildebrand plot of **3** for various concentrations of  $\text{Ag}^+$  ion at 298 K. The associate constant ( $K_a$ ) was calculated to be  $3.86 \times 10^3 \pm 572 \text{ M}^{-1}$ .

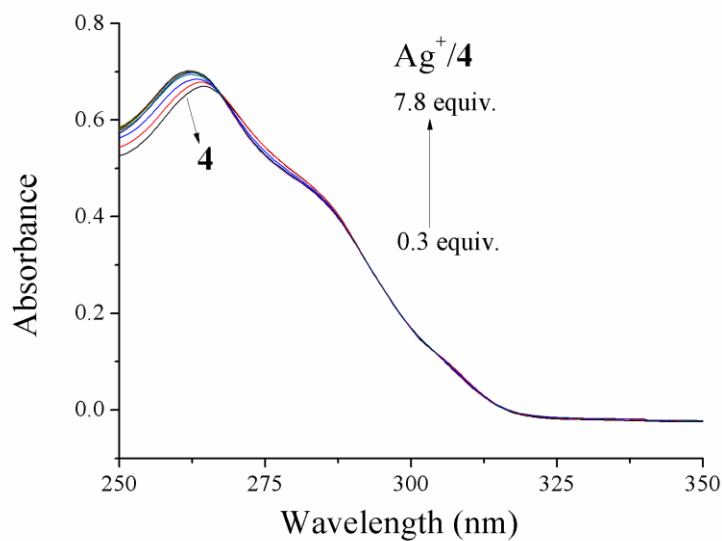

**Figure S17** UV titration studies of **4** ( $1.5 \times 10^5$  M/L) upon addition of  $\text{AgClO}_4$  in  $\text{CHCl}_3$ .

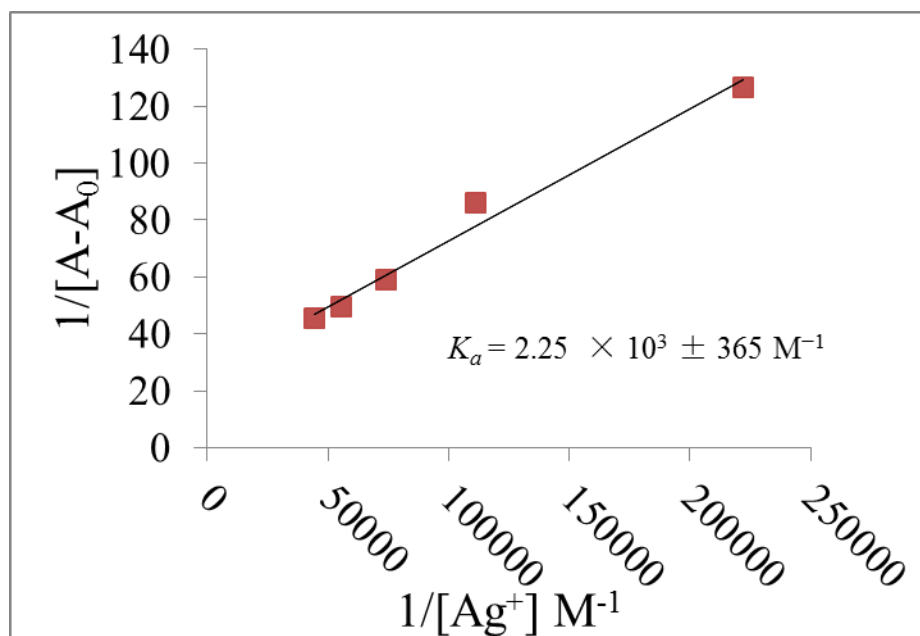

**Figure S18** Benesi-Hilderbrand plot of **4** for various concentrations of  $\text{Ag}^+$  ion at 298 K. The associate constant ( $K_a$ ) was calculated to be  $2.25 \times 10^3 \pm 365 \text{ M}^{-1}$ .

### General Description for Computational Study:

To better understand the binding properties of receptors **2–4** with  $\text{Ag}^+$ , a computation study was carried out. The molecular geometry of the individual structures in the gas-phase were fully optimized using Gaussian09,<sup>2</sup> with the B3LYP level of DFT and the lanl2dz basis set. Significant conformational changes were observed for the pyridine ring protons of **2–3** after the complexation with  $\text{Ag}^+$ . The conformation changes for **2** upon complexation with  $\text{Ag}^+$  ion can be seen in Fig. S1 and Fig. S2. Fig. S1 shows the structure (*right*) of the  $\mathbf{2} \supset \text{Ag}^+$  complex. The optimized molecular geometry suggests that the  $\text{Ag}^+$  binds, in accord with the  $^1\text{H}$  NMR complex study, via a N--- $\text{Ag}^+$ ---S short contact distance bond, which results in the conformation change. The N---N distance between the pyridine nitrogen atoms decreases from 8.001 to 3.761 (Å) (Table 1) since the nitrogen atoms move inwards after complexing with the  $\text{Ag}^+$ . All four bridge sulphur atoms are roughly the same distance from the  $\text{Ag}^+$  and presumably take an equal part in the coordination bonding. However, a different phenomenon was observed in the complexation of **3** with  $\text{Ag}^+$ . The N--N distance between the pyridine nitrogen atoms decreases from 9.305 to 4.234 (Å) after complexing with the  $\text{Ag}^+$  (Fig. S3 and Fig. S4). A similar inference can also be made for the  $\mathbf{4} \supset \text{Ag}^+$  complex (Fig. S5 and Fig. S6). The distance between the pyridine nitrogen atoms decrease from 10.138 to 3.798 (Å) (Table 1) after complexation with  $\text{Ag}^+$ . The optimized molecular geometry suggests that complexation of **3–4** with  $\text{Ag}^+$  occurs via a N--- $\text{Ag}^+$  short contact distance bond, which results in the conformation change.

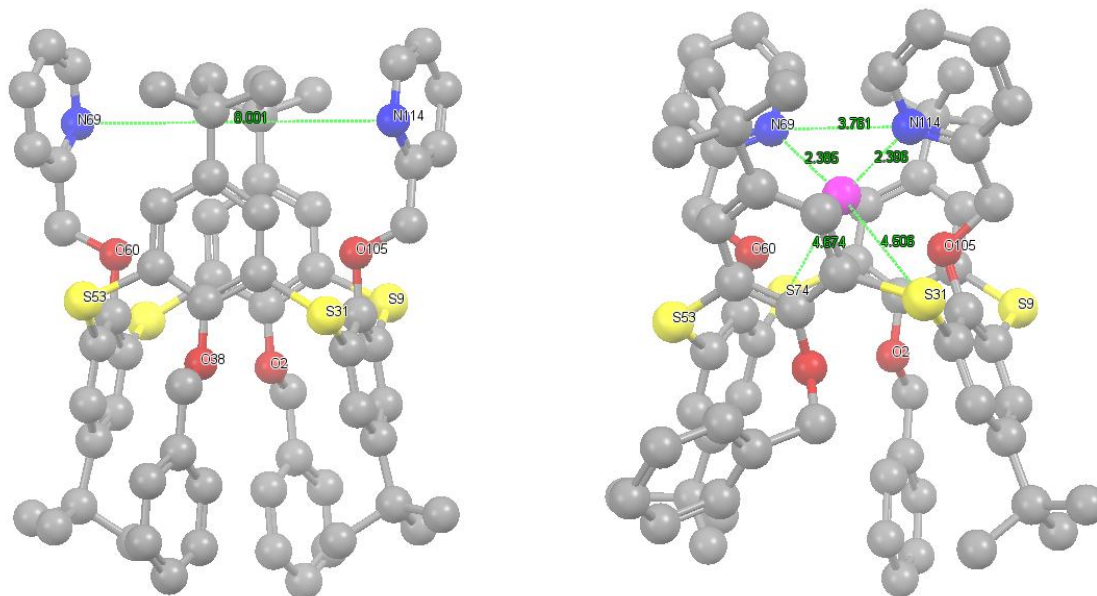

**Figure S19.** Geometry-optimized (ball and stick) structures of: *Left: 2* and *Right: 2D-Ag<sup>+</sup>* complex. Color code for Ag<sup>+</sup> = magenta, pyridine nitrogen = blue, sulphur = yellow and oxygen atom = red. Hydrogen atoms have been omitted for clarity.

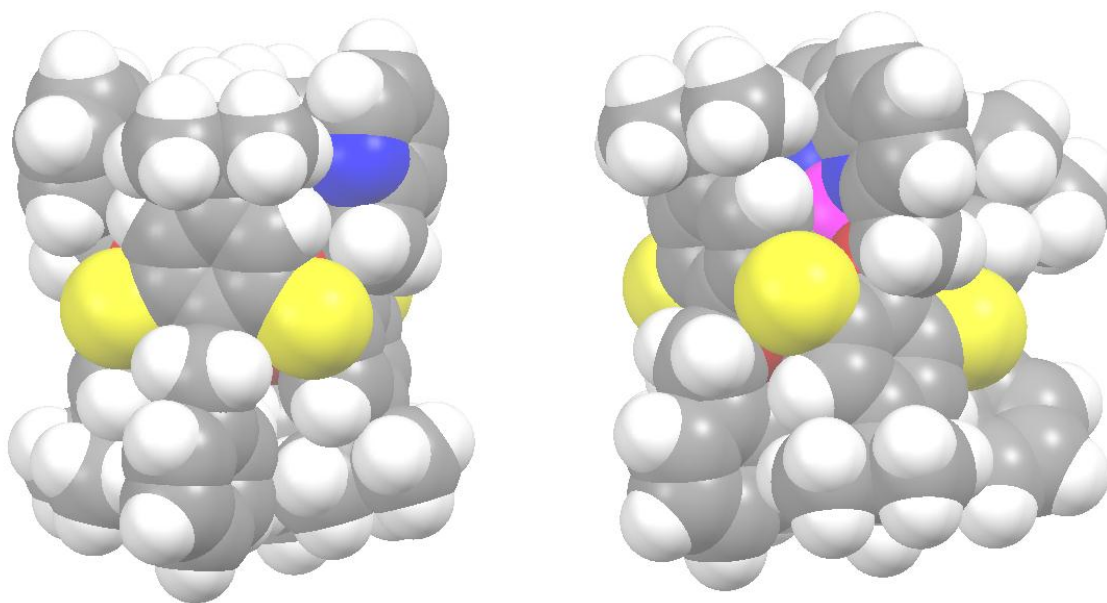

**Figure S20.** Geometry-optimized (space fill) structures of: *Left: 2* and *Right: 2D-Ag<sup>+</sup>* complex. Color code for Ag<sup>+</sup> = magenta, pyridine nitrogen = blue, sulphur = yellow and oxygen atom = red. Hydrogen atoms have been omitted for clarity.

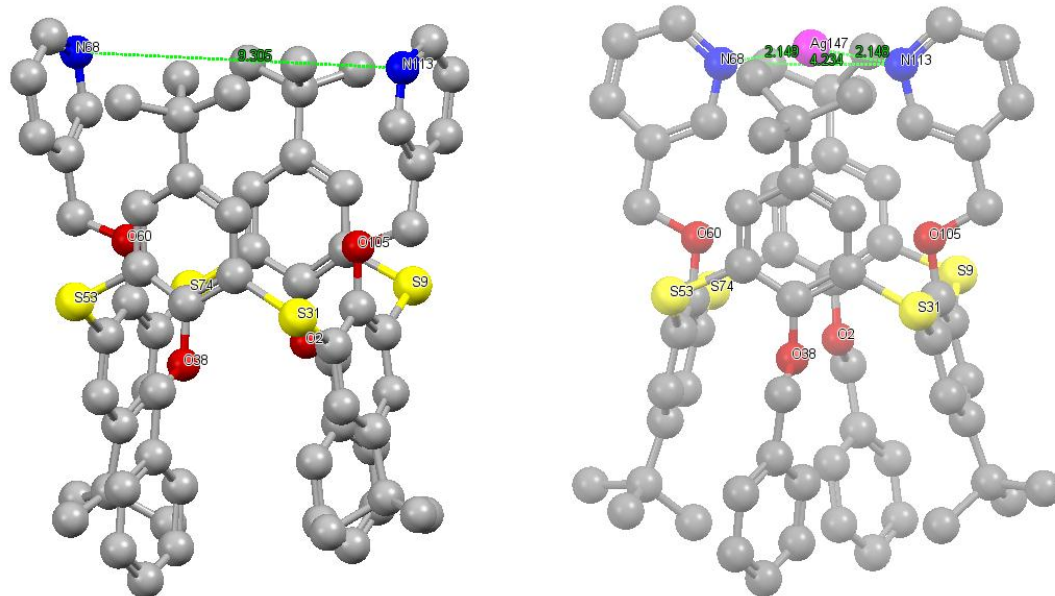

**Figure S21.** Geometry-optimized (ball and stick) structures of: *Left: 3* and *Right: 3⊃Ag<sup>+</sup>* complex. Color code for Ag<sup>+</sup> = magenta, pyridine nitrogen = blue, sulphur = yellow and oxygen atom = red. Hydrogen atoms have been omitted for clarity.

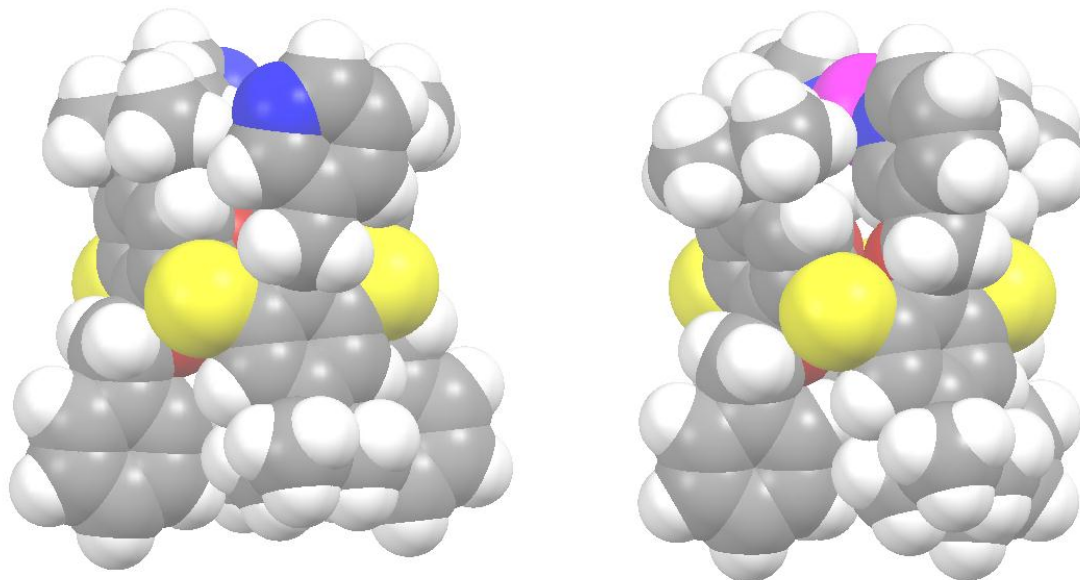

**Figure S22.** Geometry-optimized (space fill) structures of: *Left: 3* and *Right: 3⊃Ag<sup>+</sup>* complex. Color code for Ag<sup>+</sup> = magenta, pyridine nitrogen = blue, sulphur = yellow and oxygen atom = red. Hydrogen atoms have been omitted for clarity.

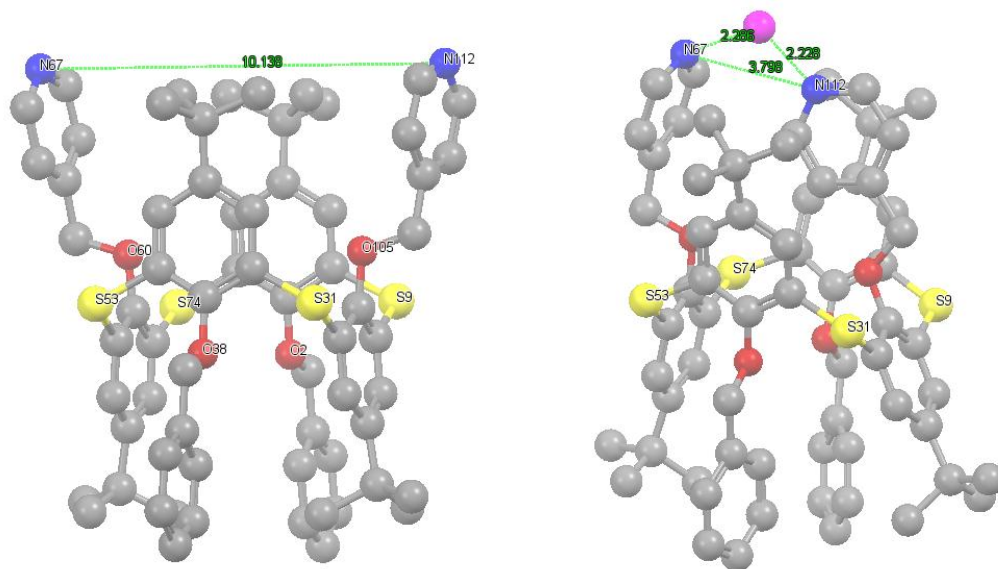

**Figure S23.** Geometry-optimized (ball and stick) structures of: *Left: 4* and *Right: 4⊃Ag<sup>+</sup> complex*. Color code for Ag<sup>+</sup> = magenta, pyridine nitrogen = blue, sulphur = yellow and oxygen atom = red. Hydrogen atoms have been omitted for clarity.

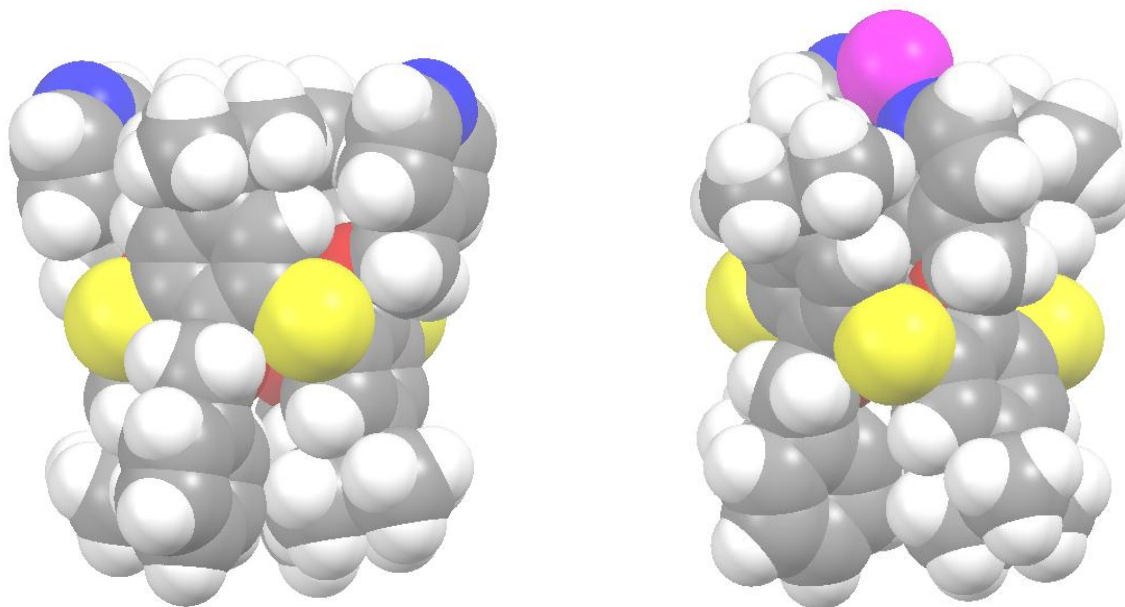

**Figure S24.** Geometry-optimized (space fill) structures of: *Left: 4* and *Right: 4⊃Ag<sup>+</sup> complex*. Color code for Ag<sup>+</sup> = magenta, pyridine nitrogen = blue, sulphur = yellow and oxygen atom = red. Hydrogen atoms have been omitted for clarity.

**Table S1** The calculated distance for selected parameters for the backbones of the 1,3-*alternate-2-4* and their complexes with Ag<sup>+</sup> optimized at B3LYP/lanl2dz level(Distance in Å).

| Parameter                         | <b>2</b><br>(Å) | <b>2</b> ⊃Ag <sup>+</sup><br>(Å) | Parameter                         | <b>3</b><br>(Å) | <b>3</b> ⊃Ag <sup>+</sup><br>(Å) | Parameter                         | <b>4</b> (Å) | <b>4</b> ⊃Ag <sup>+</sup><br>(Å) |
|-----------------------------------|-----------------|----------------------------------|-----------------------------------|-----------------|----------------------------------|-----------------------------------|--------------|----------------------------------|
| N <sub>69</sub> -N <sub>114</sub> | 8.001           | 3.761                            | N <sub>68</sub> -N <sub>113</sub> | 9.305           | 4.234                            | N <sub>67</sub> -N <sub>112</sub> | 10.138       | 3.798                            |
| N <sub>69</sub> -S <sub>9</sub>   | 8.188           | 6.841                            | N <sub>68</sub> -S <sub>9</sub>   | 6.715           | 7.651                            | N <sub>67</sub> -S <sub>9</sub>   | 10.536       | 9.319                            |
| N <sub>69</sub> -S <sub>31</sub>  | 8.89            | 6.712                            | N <sub>68</sub> -S <sub>31</sub>  | 6.219           | 7.941                            | N <sub>67</sub> -S <sub>31</sub>  | 9.96         | 9.249                            |
| N <sub>69</sub> -S <sub>53</sub>  | 5.614           | 5.231                            | N <sub>68</sub> -S <sub>53</sub>  | 9.431           | 5.966                            | N <sub>67</sub> -S <sub>53</sub>  | 6.528        | 6.713                            |
| N <sub>69</sub> -S <sub>74</sub>  | 5.036           | 4.708                            | N <sub>68</sub> -S <sub>74</sub>  | 9.971           | 6.12                             | N <sub>67</sub> -S <sub>74</sub>  | 7.3          | 6.762                            |
| N <sub>114</sub> -S <sub>9</sub>  | 5.614           | 5.512                            | N <sub>113</sub> -S <sub>9</sub>  | 9.431           | 5.953                            | N <sub>112</sub> -S <sub>9</sub>  | 6.528        | 6.942                            |
| N <sub>114</sub> -S <sub>31</sub> | 5.036           | 4.323                            | N <sub>113</sub> -S <sub>31</sub> | 9.971           | 6.132                            | N <sub>112</sub> -S <sub>31</sub> | 7.3          | 6.84                             |
| N <sub>114</sub> -S <sub>53</sub> | 8.188           | 6.556                            | N <sub>113</sub> -S <sub>53</sub> | 6.715           | 7.654                            | N <sub>112</sub> -S <sub>53</sub> | 10.536       | 7.055                            |
| N <sub>114</sub> -S <sub>74</sub> | 8.89            | 6.886                            | N <sub>113</sub> -S <sub>74</sub> | 6.219           | 7.924                            | N <sub>112</sub> -S <sub>74</sub> | 9.96         | 7.111                            |
| N <sub>69</sub> -Ag <sup>+</sup>  | -               | 2.385                            | N <sub>68</sub> -Ag <sup>+</sup>  | -               | 2.149                            | N <sub>67</sub> -Ag <sup>+</sup>  | -            | 2.286                            |
| N <sub>114</sub> -Ag <sup>+</sup> | -               | 2.396                            | N <sub>113</sub> -Ag <sup>+</sup> | -               | 2.148                            | N <sub>112</sub> -Ag <sup>+</sup> | -            | 2.228                            |
| S <sub>9</sub> -Ag <sup>+</sup>   | -               | 4.98                             | S <sub>9</sub> -Ag <sup>+</sup>   | -               | 6.811                            | S <sub>9</sub> -Ag <sup>+</sup>   | -            | 8.857                            |
| S <sub>31</sub> -Ag <sup>+</sup>  | -               | 4.506                            | S <sub>31</sub> -Ag <sup>+</sup>  | -               | 7.069                            | S <sub>31</sub> -Ag <sup>+</sup>  | -            | 8.749                            |
| S <sub>53</sub> -Ag <sup>+</sup>  | -               | 4.699                            | S <sub>53</sub> -Ag <sup>+</sup>  | -               | 6.818                            | S <sub>53</sub> -Ag <sup>+</sup>  | -            | 7.725                            |
| S <sub>74</sub> -Ag <sup>+</sup>  | -               | 4.674                            | S <sub>74</sub> -Ag <sup>+</sup>  | -               | 7.056                            | S <sub>74</sub> -Ag <sup>+</sup>  | -            | 7.8                              |



## Calculated binding energies

The DFT B3LYP/lanl2dz basis set-calculated binding energies ( $\Delta E$ ) of the  $\text{Ag}^+$  complexes of thiacalix[4]arene derivatives **2-4** ( $\text{L}_{\text{free}} + \text{Ag}^+_{\text{free}} \rightarrow \text{L}/\text{Ag}^+_{\text{complex}}$ ) formed between the  $\text{Ag}^+$  ion and the free thiacalix[4]arene derivatives **2-4** in the gas phase at 298 K are based on the equation (1), are listed in Table S2.

For this system, the binding energy  $\Delta E$  can be express as follows:

$$\Delta E = E(\text{L}/\text{Ag}^+_{\text{complex}}) - E(\text{L}_{\text{free}}) - E(\text{Ag}^+_{\text{free}}) \quad (1)$$

**Table S2** Calculated binding energies for the thiacalix[4]arene derivatives with  $\text{Ag}^+$ .

| Parameter                                                                    | <b>2</b> $\supset$ <b>Ag</b> <sup>+</sup><br>$\Delta E$ (KJ/mole) | <b>3</b> $\supset$ <b>Ag</b> <sup>+</sup><br>$\Delta E$ (KJ/mole) | <b>4</b> $\supset$ <b>Ag</b> <sup>+</sup><br>$\Delta E$ (KJ/mole) |
|------------------------------------------------------------------------------|-------------------------------------------------------------------|-------------------------------------------------------------------|-------------------------------------------------------------------|
| Binding energy for thiacalix[4]arene derivatives with <b>Ag</b> <sup>+</sup> | -488.096                                                          | -464.022                                                          | -372.966                                                          |

## Reference

2. M. J. Frisch, G. W. Trucks, H. B. Schlegel, G. E. Scuseria, M. A. Robb, J. R. Cheeseman, G. Scalmani, V. Barone, B. Mennucci, G. A. Petersson, H. Nakatsuji, M. Caricato, X. Li, H. P. Hratchian, A. F. Izmaylov, J. Bloino, G. Zheng, J. L. Sonnenberg, M. Hada, M. Ehara, K. Toyota, R. Fukuda, J. Hasegawa, M. Ishida, T. Nakajima, Y. Honda, O. Kitao, H. Nakai, T. Vreven, Jr. J. A. Montgomery, J. E. Peralta, F. Ogliaro, M. Bearpark, J. J. Heyd, E. Brothers, K. N. Kudin, V. N. Staroverov, T. Keith, R. Kobayashi, J. Normand, K. Raghavachari, A. Rendell, J. C. Burant, S. S. Iyengar, J. Tomasi, M. Cossi, N. Rega, J. M. Millam, M. Klene, J. E. Knox, J. B. Cross, V. Bakken, C. Adamo, J. Jaramillo, R. Gomperts, R. E. Stratmann, O. Yazyev, A. J. Austin, R. Cammi, C. Pomelli, J. W. Ochterski, R. L. Martin, K. Morokuma, V. G. Zakrzewski, G. A. Voth, P. Salvador, J. J. Dannenberg, S. Dapprich, A. D. Daniels, O. Farkas, J. B. Foresman, J. V. Ortiz, J. Cioslowski, D. J. Fox. *Gaussian 09, Revision D.01*; Gaussian, Inc., Wallingford CT, 2013.
